# Supplementary material for: CRISPR/Cas9 editing of endogenous banana streak virus in the B genome of Musa spp. overcomes a major challenge in banana breeding
Source: PubMed Central journal article supplement (PMC6355771; doi:10.1038/s42003-019-0288-7), 2019-01-31
Supplement: 42003_2019_288_MOESM2_ESM.pdf [file 42003_2019_288_MOESM2_ESM.pdf]

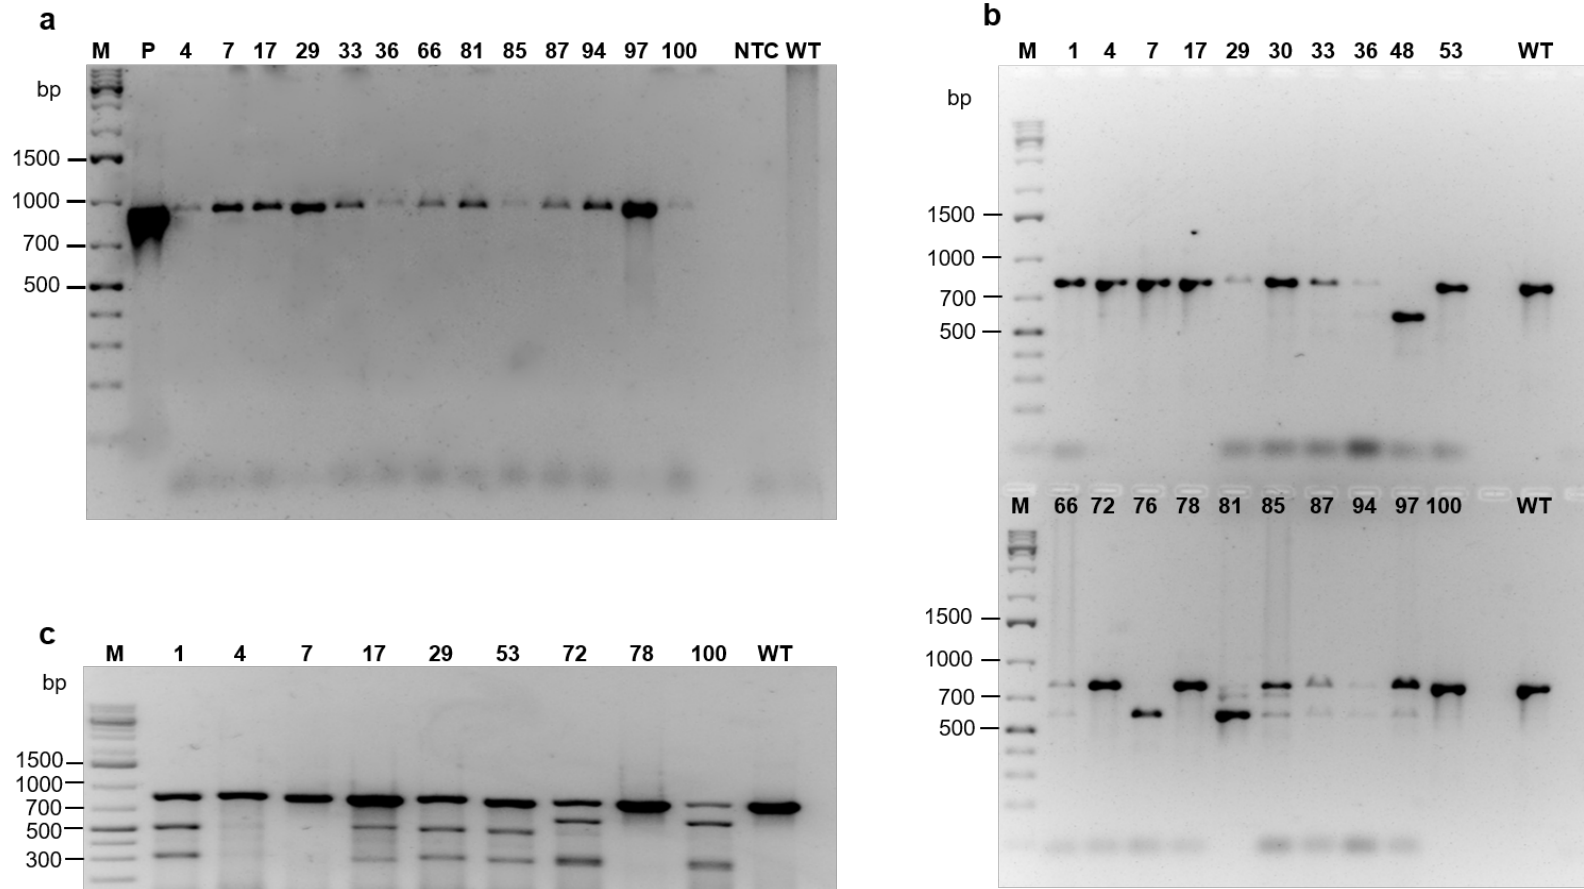

**Supplementary Figure 1:** Molecular characterization of transgenic events of Gonja Manjaya. **a)** PCR amplification to confirm the presence of *Cas9* gene in transgenic events. **b)** Band shift analysis of genomic DNA of transgenic events by PCR amplification using primer set P1 to detect mutations at target sites S1 and S2. If Cas9 cleaves the two gRNAs simultaneously, mutant plants will have band shift of 197 bp compared to the wild type non-edited control plant. **c)** T7 endonuclease I assay to detect mutations in the transgenic plants. The DNA fragments were amplified by PCR using primer set P1 and mismatches resulting from deletion or insertion at S1 and S2, were detected by T7 endonuclease I digestion. 1-100, independent transgenic events; WT, wild type non-transgenic control plant; P, plasmid pMR215-BSV1 as positive control; M, molecular marker.

**Supplementary Table 1:** List of primers used in the study.

| Primer             | Sequence 5'-3'                                                                                                  |
|--------------------|-----------------------------------------------------------------------------------------------------------------|
| gRNA1 (S1 in ORF1) | S1F <u>GTTGTTGAGCAAAGAAGACGTTG</u> (underlined nucleotides are adapters)<br>S1R <u>AAACCAACGTCCTTCTTTGCTCAA</u> |
| gRNA2 (S2 in ORF2) | S2F <u>GTTGGCTGGAACAACCTGGTGACT</u> (underlined nucleotides are adapters)<br>S2R <u>AAACAGTCACCAGTTGTTCCAGC</u> |
| gRNA3 (S3 in ORF3) | S3F <u>GTTGATG GAGTTCATATGATCAT</u> (underlined nucleotides are adapters)<br>S3R <u>AAACATGATCATATGAACTCCAT</u> |
| OsU6_chimera.F1    | CACCGGATCATGAACCAACGGCCTGGCTG                                                                                   |
| OsU6_chimera.R1    | GGGAATTGCCCTTCGAAGGGAC                                                                                          |
| noBbsI.For         | AGTCTTGC GACTGAGCCTTTCGTTTTATTTGATGCC                                                                           |
| noBbsI.Rev         | CTCAGTCGCAAGACTGGGCCTTTCGTTTTATCTG                                                                              |
| P1F                | CAACGGAAGCCAAAGTCTCA                                                                                            |
| P1R                | CCACCGTCTTCCCTGGTTG                                                                                             |
| P2F                | TGGAAGGGTTGTAGGACGAC                                                                                            |
| P2R                | TGCTTACCTTGAATCCCT                                                                                              |
| P3F                | TGGGTTGGTAAGCAATGGTTC                                                                                           |
| P3R                | GCTTCTGGACATGCTTAGTCA                                                                                           |
| P4F                | TTGGTGTTAACTATAAGAGGCTGAA                                                                                       |
| P4R                | TTATTGCATCCACATTTGAAAAC                                                                                         |
| P5F                | GGATCTCATCATCAAGCTCCCAA                                                                                         |
| P5R                | TGCACCTTAATATCACACTGTTAGTCC                                                                                     |
| Ma06_t37830.1F     | GTGAATGGACGAGGCAAGAC                                                                                            |
| Ma06_t37830.1R     | TACCATGCAGAATTGGGAAC                                                                                            |
| Ma05_t06600.1F     | TGCCACAATTGATAGGTGA                                                                                             |
| Ma05_t06600.1R     | GCATATAAGCCCGACCGTAA                                                                                            |
| Ma01_t31620.1F     | GCCTTGCCATGCAGACACA                                                                                             |

|                    |                                                                                                                                                      |
|--------------------|------------------------------------------------------------------------------------------------------------------------------------------------------|
| Ma01_t31620.1R     | GTCAAGACTTACAGCTTACG                                                                                                                                 |
| Ma01_t10610.1F     | ACCAGGGCACGTGCCTCACAA                                                                                                                                |
| Ma01_t10610.1R     | GACACACACATCAAACCTTCTTTTG                                                                                                                            |
| Ma08_t27880.1F     | GTTTTGGGTTTGCTTGAACC                                                                                                                                 |
| Ma08_t27880.1R     | TCACAAGCATGGATGTTCGTT                                                                                                                                |
| Bchr6_T18444F      | ATGGACGAGGCAAGACGTGGA                                                                                                                                |
| Bchr6_T18444R      | TGGATCCTCACTGTCGGCGT                                                                                                                                 |
| Bchr5_T12273F      | AAAATTGGAGCCATCAGCAC                                                                                                                                 |
| Bchr5_T12273R      | AGCCAAGCTATCCTGTGGAA                                                                                                                                 |
| Bchr4_T08704F      | TGCTCATGACCCATTCATCA                                                                                                                                 |
| Bchr4_T08704R      | TATAGGCCTGCTCGATTCCA                                                                                                                                 |
| Bchr1_T00896F      | AGCAATCTACGAAGGAGGA                                                                                                                                  |
| Bchr1_T00896R      | GCAGCTTCAACTTCAGTGTCC                                                                                                                                |
| pDONR_P4rP3r_gRNA1 | attB4r_OsU6gRNA GGGGACAACCTTTTCTATACAAAAGTTGTAGGATCATGAACCAACGGCCTGGCTG<br>attB3r_OsU6gRNA GGGGACAACCTTATTATACAAAAGTTGTAATTGCCCTTCGAAGGGACAAAAAAGC   |
| pDONR_P1P4_gRNA2   | attB1_OsU6gRNA GGGGACAAGTTTGTACAAAAAAGCAGGCTTAGGATCATGAACCAACGGCCTGGCTG<br>attB4_OsU6gRNA GGGGACAACCTTTGTATAGAAAAGTTGGGTGAATTGCCCTTCGAAGGGACAAAAAAGC |
| pDONR_P3P2_gRNA3   | attB3_OsU6gRNA GGGGACAACCTTTGTATAATAAAGTTGTAGGATCATGAACCAACGGCCTGGCTG<br>attB2_OsU6gRNA GGGGACCCTTTGTACAAGAAAGCTGGGTAAATTGCCCTTCGAAGGGACAAAAAAGC     |

**Supplementary Table 2:** List of potential off-target sites for mutation identified in A and B genome of banana.

| gRNA sequence from BSV + PAM | Potential off target sites in A genome ( <i>Musa acuminata</i> ) |                  |                |                   |           |          |              |                                                             |
|------------------------------|------------------------------------------------------------------|------------------|----------------|-------------------|-----------|----------|--------------|-------------------------------------------------------------|
|                              | Gene ID                                                          | Start nucleotide | End nucleotide | Chromosome number | Start hit | End hit  | Identity (%) | Sequence alignment                                          |
| TTGAGCAAAGAAGACGTTGAGG       |                                                                  | 1                | 20             | Chr07             | 2863198   | 2863217  | 86.36        | TTGAGCAAAGAAGACGTTGA<br>           <br>TTAAGGAAAGAAGACGTTGA |
|                              | Ma06_t33580.1                                                    | 3                | 20             | Chr06             | 34157611  | 34157628 | 77.27        | GAGCAAAGAAGACGTTGA<br>           <br>GAGCAAAGAAGAAGTTGA     |
|                              | Ma05_t06600.1                                                    | 3                | 20             | Chr05             | 4885359   | 4885376  | 77.27        | GAGCAAAGAAGACGTTGA<br>           <br>GAGCAAAGAAGAAGTTGA     |
|                              | Ma09_t30220.1                                                    | 4                | 19             | Chr09             | 40456491  | 40456506 | 68.18        | AGCAAAGAAGACGTTG<br>           <br>AGCAAAGAAGACGTTG         |
|                              | Ma06_t37830.1                                                    | 8                | 22             | Chr06             | 36778699  | 36778713 | 63.64        | AAGAAGACGTTGAGG<br>           <br>AAGAAGACGTTGAGG           |
|                              | Ma09_t25390.1                                                    | 5                | 19             | Chr09             | 36870057  | 36870071 | 63.64        | GCAAAGAAGACGTTG<br>           <br>GCAAAGAAGACGTTG           |
|                              |                                                                  | 2                | 16             | Chr05             | 21277120  | 21277134 | 63.64        | TGAGCAAAGAAGACG<br>           <br>TGAGCAAAGAAGACG           |
|                              |                                                                  | 1                | 15             | Chr05             | 1352096   | 1352110  | 63.64        | TTGAGCAAAGAAGAC<br>           <br>TTGAGCAAAGAAGAC           |
|                              | Ma05_t09410.1                                                    | 6                | 20             | Chr05             | 6800092   | 6800106  | 63.64        | CAAAGAAGACGTTGA<br>           <br>CAAAGAAGACGTTGA           |
|                              | Ma11_t18440.1                                                    | 2                | 16             | Chr11             | 23494840  | 23494854 | 63.64        | TGAGCAAAGAAGACG<br>           <br>TGAGCAAAGAAGACG           |
|                              | Ma07_t07430.1                                                    | 1                | 15             | Chr07             | 5522379   | 5522393  | 63.64        | TTGAGCAAAGAAGAC<br>           <br>TTGAGCAAAGAAGAC           |

|                         |               |   |    |       |          |          |       |                                                                         |
|-------------------------|---------------|---|----|-------|----------|----------|-------|-------------------------------------------------------------------------|
| GCTGGAACAACCTGGTGACTGGG | Ma05_t31620.1 | 1 | 23 | Chr05 | 41456271 | 41456293 | 95.65 | TGCTGGAACAACCTGGTGACTGGG<br>                <br>TGCTGAAAAATCTGGTGACTGGG |
|                         | Ma01_t10610.1 | 2 | 21 | Chr01 | 7639726  | 7639745  | 86.36 | CTGGAACAACCTGGTGACTGG<br>            <br>CTGGTCCAACCTGGTGACTGG          |
|                         | Ma09_t17510.1 | 3 | 21 | Chr09 | 13077000 | 13077017 | 77.27 | TGGAACAACCTGGTGACTG<br>           <br>TGGAACAACCTGATGACTG               |
|                         | Ma04_t03550.1 | 1 | 15 | Chr04 | 2727599  | 2727613  | 63.64 | GCTGGAACAACCTGGT<br>     <br>GCTGGAACAACCTGGT                           |
|                         | Ma04_t18600.1 | 3 | 17 | Chr04 | 20644374 | 20644388 | 63.64 | TGGAACAACCTGGTGA<br>     <br>TGGAACAACCTGGTGA                           |
|                         | Ma04_t03410.2 | 7 | 21 | Chr04 | 2637520  | 2637534  | 63.64 | ACAACCTGGTGACTGG<br>     <br>ACAACCTGGTGACTGG                           |
|                         |               | 3 | 17 | Chr03 | 15645024 | 15645038 | 63.64 | TGGAACAACCTGGTGA<br>     <br>TGGAACAACCTGGTGA                           |
|                         | Ma05_t01980.1 | 6 | 20 | Chr05 | 1247491  | 1247505  | 63.64 | AACAACCTGGTGACTG<br>     <br>AACAACCTGGTGACTG                           |
|                         | Ma11_t06300.1 | 7 | 21 | Chr11 | 5090027  | 5090041  | 63.64 | ACAACCTGGTGACTGG<br>     <br>ACAACCTGGTGACTGG                           |
|                         |               | 6 | 20 | Chr07 | 12776568 | 12776582 | 63.64 | AACAACCTGGTGACTG<br>     <br>AACAACCTGGTGACTG                           |
|                         | Ma08_t28040.1 | 1 | 15 | Chr08 | 40099833 | 40099847 | 63.64 | GCTGGAACAACCTGGT<br>     <br>GCTGGAACAACCTGGT                           |
|                         |               | 2 | 16 | Chr08 | 11139839 | 11139853 | 63.64 | CTGGAACAACCTGGTG<br>     <br>CTGGAACAACCTGGTG                           |
|                         | Ma10_t05740.1 | 1 | 15 | Chr10 | 17114823 | 17114837 | 63.64 | GCTGGAACAACCTGGT<br>     <br>GCTGGAACAACCTGGT                           |

|                        |               |   |    |              |          |          |       |                                                                    |
|------------------------|---------------|---|----|--------------|----------|----------|-------|--------------------------------------------------------------------|
| ATGGAGTTCATATGATCATAGG | Ma08_t27880.1 | 1 | 20 | Chr08        | 40001548 | 40001567 | 86.36 | ATGGAGTTCATATGATCATA<br>              <br>ATGGAGACCATATGATCATA     |
|                        |               | 1 | 20 | Chr03        | 25523263 | 25523282 | 86.36 | ATGGAGTTCATATGATCATA<br>                 <br>ATGTAGTTCATATGATTATA  |
|                        | Ma01_t00530.1 | 2 | 21 | Chr01        | 385460   | 385479   | 86.36 | TGGAGTTCATATGATCATAG<br>                  <br>TGGAGTTCATATGTTTATAG |
|                        |               | 2 | 20 | Chr08        | 32038771 | 32038789 | 81.82 | TGGAGTTCATATGATCATA<br>             <br>TGGTGTTCATATGATCATA        |
|                        |               | 2 | 20 | Chr10        | 7743722  | 7743740  | 81.82 | TGGAGTTCATATGATCATA<br>             <br>TGGTGTTCATATGATCATA        |
|                        | Ma09_t21950.1 | 1 | 18 | Chr09        | 33919002 | 33919019 | 77.27 | ATGGAGTTCATATGATCA<br>                <br>ATGGAGTTCATATCATCA       |
|                        |               | 2 | 19 | Chr09        | 27358998 | 27359015 | 77.27 | TGGAGTTCATATGATCAT<br>              <br>TGAATTCATATGATCAT          |
|                        | Ma01_t10050.1 | 4 | 20 | Chr01        | 7190459  | 7190475  | 72.73 | GAGTTCATATGATCATA<br>               <br>GAGTTCATATGATCATA          |
|                        | Ma04_t11810.1 | 6 | 21 | Chr04        | 8419515  | 8419530  | 68.18 | GTTTCATATGATCATAG<br>           <br>GTTTCATATGATCATAG              |
|                        | Ma04_t21240.1 | 4 | 19 | Chr04        | 23795046 | 23795061 | 68.18 | GAGTTCATATGATCAT<br>           <br>GAGTTCATATGATCAT                |
|                        | Ma05_t28500.1 | 4 | 19 | Chr05        | 39488377 | 39488392 | 68.18 | GAGTTCATATGATCAT<br>           <br>GAGTTCATATGATCAT                |
|                        | Ma05_t18370.1 | 2 | 17 | Chr05        | 23654494 | 23654509 | 68.18 | TGGAGTTCATATGATC<br>           <br>TGGAGTTCATATGATC                |
|                        |               | 6 | 20 | ChrUn_random | 42307679 | 42307693 | 63.64 | GTTTCATATGATCATA<br>           <br>GTTTCATATGATCATA                |

|               |   |    |       |          |          |       |                                               |
|---------------|---|----|-------|----------|----------|-------|-----------------------------------------------|
|               | 8 | 22 | Chr04 | 21341215 | 21341229 | 63.64 | TCATATGATCATAGG<br>       <br>TCATATGATCATAGG |
|               | 1 | 15 | Chr04 | 33115415 | 33115429 | 63.64 | ATGGAGTTCATATGA<br>       <br>ATGGAGTTCATATGA |
| Ma05_t25660.1 | 7 | 21 | Chr05 | 37522305 | 37522319 | 63.64 | TTCATATGATCATAG<br>       <br>TTCATATGATCATAG |
|               | 6 | 20 | Chr05 | 22429911 | 22429925 | 63.64 | GTTCATATGATCATA<br>       <br>GTTCATATGATCATA |
|               | 6 | 20 | Chr05 | 1135757  | 1135771  | 63.64 | GTTCATATGATCATA<br>       <br>GTTCATATGATCATA |
|               | 3 | 17 | Chr06 | 29511504 | 29511518 | 63.64 | GGAGTTCATATGATC<br>       <br>GGAGTTCATATGATC |
|               | 6 | 20 | Chr06 | 16476946 | 16476960 | 63.64 | GTTCATATGATCATA<br>       <br>GTTCATATGATCATA |
|               | 3 | 17 | Chr06 | 9077312  | 9077326  | 63.64 | GGAGTTCATATGATC<br>       <br>GGAGTTCATATGATC |
|               | 6 | 20 | Chr06 | 18270895 | 18270909 | 63.64 | GTTCATATGATCATA<br>       <br>GTTCATATGATCATA |
| Ma03_t30210.1 | 7 | 21 | Chr03 | 32945445 | 32945459 | 63.64 | TTCATATGATCATAG<br>       <br>TTCATATGATCATAG |
|               | 5 | 19 | Chr03 | 7232551  | 7232565  | 63.64 | AGTTCATATGATCAT<br>       <br>AGTTCATATGATCAT |
|               | 5 | 19 | Chr03 | 7235003  | 7235017  | 63.64 | AGTTCATATGATCAT<br>       <br>AGTTCATATGATCAT |
|               | 6 | 20 | Chr03 | 29098688 | 29098702 | 63.64 | GTTCATATGATCATA<br>       <br>GTTCATATGATCATA |

|  |               |   |    |       |          |          |       |                                               |
|--|---------------|---|----|-------|----------|----------|-------|-----------------------------------------------|
|  | Ma11_t12150.1 | 1 | 15 | Chr11 | 15988683 | 15988697 | 63.64 | ATGGAGTTCATATGA<br>     <br>ATGGAGTTCATATGA   |
|  |               | 6 | 20 | Chr07 | 22829650 | 22829664 | 63.64 | G TTCATATGATCATA<br>     <br>G TTCATATGATCATA |
|  | Ma07_t17510.1 | 5 | 19 | Chr07 | 20226213 | 20226227 | 63.64 | AGTTCATATGATCAT<br>     <br>AGTTCATATGATCAT   |
|  | Ma07_t18860.1 | 5 | 19 | Chr07 | 26790705 | 26790719 | 63.64 | AGTTCATATGATCAT<br>     <br>AGTTCATATGATCAT   |
|  |               | 6 | 20 | Chr07 | 20165904 | 20165918 | 63.64 | G TTCATATGATCATA<br>     <br>G TTCATATGATCATA |
|  |               | 6 | 20 | Chr10 | 15677881 | 15677895 | 63.64 | G TTCATATGATCATA<br>     <br>G TTCATATGATCATA |
|  |               | 6 | 20 | Chr02 | 23388132 | 23388146 | 63.64 | G TTCATATGATCATA<br>     <br>G TTCATATGATCATA |
|  |               | 5 | 19 | Chr02 | 26012267 | 26012281 | 63.64 | AGTTCATATGATCAT<br>     <br>AGTTCATATGATCAT   |

| gRNA sequence from BSV + PAM | Potential off target sites in B genome ( <i>Musa balbisiana</i> ) |                  |                |                   |           |          |              |                                                       |
|------------------------------|-------------------------------------------------------------------|------------------|----------------|-------------------|-----------|----------|--------------|-------------------------------------------------------|
|                              | Gene ID                                                           | Start nucleotide | End nucleotide | Chromosome number | Start hit | End hit  | Identity (%) | Sequence alignment                                    |
| TTGAGCAAAGAAGACGTTGAGG       |                                                                   | 2                | 21             | Chr05             | 2521108   | 2521126  | 81.82        | TGAGCAAAGAAGACGTTGAG<br>     <br>TGAGCAA-GAAGACGTTGAG |
|                              | ITC1587_Bchr6_T18081                                              | 3                | 20             | Chr06             | 24830292  | 24830309 | 77.27        | GAGCAAAGAAGACGTTGA<br>     <br>GAGCAAAGAAGAAGTTGA     |
|                              | ITC1587_Bchr5_T12273                                              | 3                | 20             | Chr05             | 4536286   | 4536303  | 77.27        | GAGCAAAGAAGACGTTGA<br>     <br>GAGCAAAGAAGAAGTTGA     |



|                                |                       |   |    |              |           |           |       |                                                         |
|--------------------------------|-----------------------|---|----|--------------|-----------|-----------|-------|---------------------------------------------------------|
|                                |                       | 4 | 19 | Chr09        | 25132571  | 25132586  | 68.18 | AGCAAAGAAGACGTTG<br>     <br>AGCAAAGAAGACGTTG           |
|                                | ITC1587_Bchr7_P19225  | 1 | 15 | Chr07        | 5146248   | 5146262   | 63.64 | TGAGCAAAGAAGAC<br>     <br>TTGAGCAAAGAAGAC              |
|                                | ITC1587_Bchr6_T18444  | 8 | 22 | Chr06        | 27129733  | 27129747  | 63.64 | AAGAAGACGTTGAGG<br>     <br>AAGAAGACGTTGAGG             |
|                                | ITC1587_Bchr11_T33819 | 2 | 16 | Chr11        | 16621602  | 16621616  | 63.64 | TGAGCAAAGAAGACG<br>     <br>TGAGCAAAGAAGACG             |
|                                | ITC1587_Bchr5_T12522  | 6 | 20 | Chr05        | 6186959   | 6186973   | 63.64 | CAAAGAAGACGTTGA<br>     <br>CAAAGAAGACGTTGA             |
|                                |                       | 2 | 16 | Chr05        | 13390573  | 13390587  | 63.64 | TGAGCAAAGAAGACG<br>     <br>TGAGCAAAGAAGACG             |
| <b>GCTGGAACAACCTGGTGACTGGG</b> |                       | 3 | 20 | Chr09        | 11368005  | 11368022  | 77.27 | TGGAACAACCTGGTGACTG<br>     <br>TGGAACAACCTGATGACTG     |
|                                | ITC1587_Bchr4_T08704  | 1 | 15 | Chr04        | 2353370   | 2353384   | 63.64 | GCTGGAACAACCTGGT<br>     <br>GCTGGAACAACCTGGT           |
|                                |                       | 6 | 20 | Chr07        | 11623702  | 11623716  | 63.64 | AACAACCTGGTGACTG<br>     <br>AACAACCTGGTGACTG           |
|                                |                       | 1 | 15 | Chr10        | 869294    | 869308    | 63.64 | GCTGGAACAACCTGGT<br>     <br>GCTGGAACAACCTGGT           |
|                                | ITC1587_Bchr5_T11827  | 6 | 20 | Chr05        | 1144142   | 1144156   | 63.64 | AACAACCTGGTGACTG<br>     <br>AACAACCTGGTGACTG           |
|                                | ITC1587_Bchr8_T24443  | 1 | 15 | Chr08        | 23286778  | 23286792  | 63.64 | GCTGGAACAACCTGGT<br>     <br>GCTGGAACAACCTGGT           |
| <b>ATGGAGTTCATATGATCATAGG</b>  |                       | 1 | 21 | ChrUn_random | 137660281 | 137660301 | 90.91 | ATGGAGTTCATATGATCATAG<br>     <br>ATGGATGTCATATGATCATAG |

|                              |  |   |    |              |          |          |       |                                                           |
|------------------------------|--|---|----|--------------|----------|----------|-------|-----------------------------------------------------------|
|                              |  | 1 | 21 | Chr1         | 21774466 | 21774486 | 90.91 | ATGGAGTTCATATGATCATAG<br>       <br>ATGGATGTCATATGATCATAG |
| ITC1587_BchrUn_random_T36872 |  | 1 | 20 | ChrUn_random | 65857817 | 65857836 | 86.36 | ATGGAGTTCATATGATCATA<br>        <br>ATAGAGATCATATGATCATA  |
|                              |  | 1 | 20 | Chr07        | 20607845 | 20607864 | 86.36 | ATGGAGTTCATATGATCATA<br>    <br>ATTGAGTTCATATGATTATA      |
|                              |  | 1 | 20 | Chr08        | 23191148 | 23191167 | 86.36 | ATGGAGTTCATATGATCATA<br>       <br>ATGGAGATCATATGATCAT    |
| ITC1587_Bchr1_T00896         |  | 2 | 21 | Chr1         | 6608674  | 6608693  | 86.36 | TGGAGTTCATATGATCATAG<br>         <br>TGGAGTTCATATGTTTATAG |
|                              |  | 2 | 19 | Chr09        | 13282715 | 13282732 | 77.27 | TGGAGTTCATATGATCAT<br>     <br>TGGAATTCATATGATCAT         |
|                              |  | 1 | 18 | Chr05        | 5216307  | 5216324  | 77.27 | ATGGAGTTCATATGATCA<br>         <br>ATGGAGTTCATATGAACA     |
| ITC1587_Bchr4_T01462         |  | 4 | 20 | Chr01        | 10982691 | 10982707 | 72.73 | GAGTTCATATGATCATA<br>         <br>GAGTTCATATGATCATA       |
|                              |  | 5 | 20 | Chr01        | 6490709  | 6490724  | 68.18 | AGTTCATATGATCATA<br>         <br>AGTTCATATGATCATA         |
| ITC1587_Bchr1_T00046         |  | 4 | 19 | Chr01        | 335679   | 335694   | 68.18 | GAGTTCATATGATCAT<br>         <br>GAGTTCATATGATCAT         |
|                              |  | 5 | 20 | Chr05        | 5209637  | 5209652  | 68.18 | AGTTCATATGATCATA<br>         <br>AGTTCATATGATCATA         |
| ITC1587_Bchr3_T08047         |  | 7 | 21 | Chr03        | 22264915 | 22264929 | 63.64 | TTCATATGATCATAG<br>         <br>TTCATATGATCATAG           |
|                              |  | 5 | 19 | Chr03        | 6492812  | 6492826  | 63.64 | AGTTCATATGATCAT<br>         <br>AGTTCATATGATCAT           |

|                              |  |   |    |              |           |           |       |                                               |
|------------------------------|--|---|----|--------------|-----------|-----------|-------|-----------------------------------------------|
|                              |  | 1 | 15 | Chr03        | 1031873   | 1031887   | 63.64 | ATGGAGTTCATATGA<br>     <br>ATGGAGTTCATATGA   |
| ITC1587_BchrUn_random_T38712 |  | 5 | 19 | ChrUn_random | 113663668 | 113663682 | 63.64 | AGTTCATATGATCAT<br>     <br>AGTTCATATGATCAT   |
|                              |  | 1 | 15 | Chr04        | 21070625  | 21070639  | 63.64 | ATGGAGTTCATATGA<br>     <br>ATGGAGTTCATATGA   |
| ITC1587_Bchr2_T03632         |  | 2 | 16 | Chr02        | 7174143   | 7174157   | 63.64 | TGGAGTTCATATGAT<br>     <br>TGGAGTTCATATGAT   |
| ITC1587_Bchr11_T33165        |  | 1 | 15 | Chr11        | 11377101  | 11377115  | 63.64 | ATGGAGTTCATATGA<br>     <br>ATGGAGTTCATATGA   |
|                              |  | 3 | 17 | Chr06        | 7042940   | 7042954   | 63.64 | GGAGTTCATATGATC<br>     <br>GGAGTTCATATGATC   |
|                              |  | 3 | 17 | Chr06        | 20692879  | 20692893  | 63.64 | GGAGTTCATATGATC<br>     <br>GGAGTTCATATGATC   |
| ITC1587_Bchr5_T14203         |  | 7 | 21 | Chr05        | 19805136  | 19805150  | 63.64 | TTCATATGATCATAG<br>     <br>TTCATATGATCATAG   |
| ITC1587_Bchr5_T12106         |  | 7 | 21 | Chr05        | 3420839   | 3420853   | 63.64 | TTCATATGATCATAG<br>     <br>TTCATATGATCATAG   |
| ITC1587_Bchr5_T11815         |  | 6 | 20 | Chr05        | 1042809   | 1042823   | 63.64 | GTTTCATATGATCATA<br>     <br>GTTTCATATGATCATA |
|                              |  | 5 | 19 | Chr05        | 21560834  | 21560848  | 63.64 | AGTTCATATGATCAT<br>     <br>AGTTCATATGATCAT   |



**Supplementary Note 3:** Sequence of potential off-target sites sequenced by Sanger sequencing for confirmation of mutations. The potential off target sites were amplified from genome edited and wild type control plants using primers as underlined. Black bold and blue indicate potential site matching with gRNA and PAM.

>**Ma05\_t06600.1**

TGCCACAATTGATAGGTGATTCGAAGGATTTGCTACTTTTGATAACCTGCGTTGCCCTCCCGACATCCACTGGCCGTAGATTTTTAGTTCGAGGAAGAAAAT  
TGGAGCCATCAGCACGTACCATAGAGCGGCATGCAGATTGACGGCAACCGAGGGTGGCATAACCGATTGCTAAGAAGAGGCAGGCTATCCATGG**GAGCAAAG**  
**AAGAAGTTG**ACTCGGATGGGGTGATAGTACTCCCGCGGATTGCTTCAAAGTAAAATATGATCTTCAGCACGTAGATGGCGGACACAATGCCCATCAATGC  
AAGTGAGATGCACCAGAGAACGAGATTTACGGTCGGGCTTATATGC

>**Ma01\_t31620.1**

GCCTTGGCCATGCAGACACAGTAGCCCATCACTTCGAATGCTGCTCTCCTTTCGTACTGGAGAAATTTCCATCCAGCTAGGACTAGATTGACTGTAAACCAA  
AGGAAATGAACCATATCCTCTTCCAGTTCTCATGAACAAAATCTGTGGTCAT**GCTGAAAAATCTGGTGA**CTGGGTTTCTGTATTTCAGCGGTATCATTGTTC  
TCGCAAGGCTCTGCGAACTTTTTGTTAACTCGGCTCCGCTGAGCTAACCATCCCTTGAAGTAATGTCTCAAGCTGCCAAAGCTGGAACAGAGAACGTAAGC  
TGTAAGTCTTGAC

>**Ma01\_t10610.1**

ACCAGGGCACGTGCCTCACAATACCATGTATACTTAGATTTAAGAAAATGCTCCATGGCACATGCTGGCATAACCATGTGTTTTTATGTCGGCACGTAATAA  
CCCGTACT**GGTCCA**ACTGGTGA**CTGG**CATAGGTCCAGCACCAAGAAACATCAAACCATGAACAAGGCAACAAAAGAAGTTTGATGTGTGTGTC

> **Ma08\_t27880.1**

GTTTTGGGTTTGCTTGAACCCATGCCCTTCCAGTGCCAACAGAGGATCTGCTGTGTTGAAGCACCACTTTTGGGATGATGCATGTCTGGTCCGTGAATGTGGC  
CAGATATTCTGTGGAGTTAGTCATCTGAT**GGAGACCATATGATCAT**AACCAAAAGACCTTTGGTTATTTAATCAGAAAGACATTATTCTCTCTCCTAATGA  
AGTTCTTTTAGTTTCTCCCAGATGGTAATTTCTTTGGCGACATGATGTTGCATTTTGATGGAAAATGTGGCCCCAGAAACGACATCCATGCTTGTGA

>**ITC1587\_Bchr5\_T12273**

AAAATTGGAGCCATCAGCACGTACCATAGAGCGGCATGCAGATTGACGGCAACCGAGGGTGGCATAACCGATTGCTAAGAAGAGGCAGGCTATCCATGGAG  
CAAAGAAGAAGTTGACTCGGATGGGGTGATAGTACTCCCGCGGATTGCTTCAAAGTAAAATATGATCTTCAGCACGTAGATGGCGGACACAATGCCCAT  
AATGCAAGTGAGATGCACCAGAGAACGAGATTTACAGTCGGGCTTATATGCAGAAACGATGTGGATGGTGATGTAGCTAGTGTCTTCCACAGGATAGCTTG  
GCT

**>ITC1587\_Bchr4\_T08704**

TGCTCATGACCCATTCATCATAACATAACAACAAAAACGGTGGTAGAAACAACAGTAATGAGAGGAAGGAAAAAGCAACAAGTGTGGCCCAACAATCTTC  
CTATGAAGCTGATTAACGAGCTTGCTCGAGATCGGTAGTGCAGTGAAGGGCAGAAGTAGGCATCAACTACGACCGGAATTCTAGTAAGAGTTAGCTGGAA  
CAACTGGTTCTGAATTCAGTGAGGCTGACTACTGACTGATCTAGTGGACTGGTCGATGCTTTTGATCGTGACAAAAGTCGTTAAGCAGCCTTAGTAGGAGAT  
TGGGTGGAATCGAGCAGGCCTATA

**>ITC1587\_Bchr1\_T00896**

AGCAATCTCACGAAGGAGGAGTTTGTTTCATGTTCTTCGACGCCAAAGCACCAGCTATCCTAGAGGAAGCTCCAAGTACAGGGGAGTGACTTTGCACAAATG  
TGGAAAGTGGGAGGCCAGAATGGGCCAGTTACTGGGTAAAAAGTATATATACTTCTGGCCTTTCTTGCCAATAGATGATTGGAGTTCATATGTTTATAGAC  
TAATGGTGTTGTGGATCATTCTGCTATGGTTTCTCTGGTTTAAAAGCATCGATTGTTCTCATAGGATTTCTTTGTCTGTGCTCTCAGATACGTCTATCTAGGTC  
TTTTCGACACTGAAGTTGAAGCTGC
